# Supplementary material for: Methane oxidation potential of soils in a rubber plantation in Thailand affected by fertilization
Source: Copernicus journal article supplement (doi:10.5194/soil-11-457-2025), 2025-06-16
Supplement: Supplementary file 1 [file soil-11-457-2025-supplement.zip]

## Sheet: Fig.1 data
Fig. 1a	Methane concentration (ppmv)
Time (days)	T1avg	T1err	T2avg	T2err	T3avg	T3err	T4avg	T4err
0	48.9017	0.942526	47.7533	0.312202	47.0166	0.291978	46.9083	0.346427
2	46.2524	1.24349	46.0084	0.0823866	46.169	0.0457771	46.0481	0.10999
5	44.6166	1.22526	46.96	0.569084	46.0719	0.0818687	45.0794	0.915663
11	43.7783	1.30745	46.289	0.510234	46.6801	0.0843565	45.7723	0.147874
37	41.3777	0.955011	45.7908	0.216779	46.2509	0.663701	45.3166	0.352153
Fig. 1b	Methane concentration (ppmv)
Time (days)	T1avg	T1err	T2avg	T2err	T3avg	T3err	T4avg	T4err
0	46.746	0.16496	47.6196	1.0063	46.7167	0.25153	47.1266	0.14471
7	46.2743	0.58824	45.7454	0.26384	45.0588	0.48954	45.6488	0.28474
14	42.052	0.91027	43.7121	0.43122	44.5531	0.91322	45.3911	0.41898
21	39.8026	1.74788	42.5912	0.77395	43.4456	1.34225	45.0492	0.34535
29	37.1648	2.62118	41.6821	0.91356	42.8882	1.65358	44.3862	0.49768

## Sheet: Fig. 2 data
Fig. 2
			Methane oxidation rate
Site	Vegetation	Treatment	PMOR
			ng g-1 DW hr-1
SKRS	Forest		0.04217
SKRS	Forest		0.15605
SKRS	Forest		1.06422
SKRS	Forest		1.2329
SKRS	Palm		0.03021
SKRS	Palm		0.04423
SKRS	Palm		0.04762
SKRS	Palm		0.23288
SKRS	Palm		0.23307
SKRS	Palm		0.43088
SKRS	Rubber	Tr1	0.0595
SKRS	Rubber	Tr1	0.08356
SKRS	Rubber	Tr1	0.08831
SKRS	Rubber	Tr1	0.17316
SKRS	Rubber	Tr2	0.0185
SKRS	Rubber	Tr2	0.05024
SKRS	Rubber	Tr2	0.0669
SKRS	Rubber	Tr2	0.10417
SKRS	Rubber	Tr3	0.01562
SKRS	Rubber	Tr3	0.01884
SKRS	Rubber	Tr3	0.0311
SKRS	Rubber	Tr3	0.08178
SKRS	Rubber	Tr4	0.01575
SKRS	Rubber	Tr4	0.02038
SKRS	Rubber	Tr4	0.02223
SKRS	Rubber	Tr4	0.03823
CRRC	Rubber	-Fertilizer	0.13066
CRRC	Rubber	-Fertilizer	0.16296
CRRC	Rubber	-Fertilizer	0.195
CRRC	Rubber	-Fertilizer	0.27755
CRRC	Rubber	+Fertilizer	0.02565
CRRC	Rubber	+Fertilizer	0.03384
CRRC	Rubber	+Fertilizer	0.08559
CRRC	Rubber	+Fertilizer	0.10484

## Sheet: Fig. 3 data
Fig. 3a	Methane concentration (ppmv)
Time (days)	Tr1 0-10cm	Tr1 10-20cm	Tr1 20-30cm	Tr1 30-40cm	Tr1 40-50cm
0	48.4641	49.3751	51.3025	51.6621	46.0716
8	48.3614	27.9939	45.9554	44.6395	44.8604
14	37.3098	8.75021	39.8178	37.6374	44.1688
21	33.7103	0	28.4655	22.2855	38.6754
28	26.705	0	15.6541	8.69352	33.288
Fig. 3b	Methane concentration (ppmv)
Time (days)	Tr2 0-10cm	Tr2 10-20cm	Tr2 20-30cm	Tr2 30-40cm	Tr2 40-50cm
0	53.0094	51.2929	48.023	47.6634	46.388
8	46.0514	41.8348	41.9693	44.4618	45.0381
14	46.2099	41.7964	40.9175	45.0765	43.1795
21	43.4237	41.1821	37.1473	42.0305	41.9727
28	44.6245	39.8372	34.5659	41.3862	39.5129
Fig. 3c	Methane concentration (ppmv)
Time (days)	Tr3 0-10cm	Tr3 10-20cm	Tr3 20-30cm	Tr3 30-40cm	Tr3 40-50cm
0	49.1977	49.5093	51.6333	49.3511	51.1826
8	49.7782	48.0829	49.8695	50.4457	48.203
14	49.8118	47.5642	51.3294	50.974	50.3641
21	49.5555	47.9117	50.9197	50.4617	49.1891
28	49.1697	46.6042	49.1503	48.9664	48.187
Fig. 3d	Methane concentration (ppmv)
Time (days)	Tr4 0-10cm	Tr4 10-20cm	Tr4 20-30cm	Tr4 30-40cm	Tr4 40-50cm
0	47.5771	46.6757	52.0457	48.3011	46.6469
8	47.9628	47.0071	49.4468	47.9532	47.8188
14	45.3983	46.3348	50.0183	47.6747	48.2846
21	43.6358	46.0123	48.0707	47.1934	47.444
28	43.7822	46.0766	48.9083	46.7543	47.0786

## Sheet: Fig. 4 data
Fig. 4a	Methane oxidation rate
	ng g-1 DW hr-1
	estimate	err
Tr1 0-1	0.0657	0.01961
Tr1 1-10	0.0425	0.01429
Tr1 10-15	0.23184	0.00979
Tr1 15-25	0.11419	0.0087
Tr1 25-30	0.25999	0.025
Tr1 30-40	0.1491	0.00325
Tr1 45-50	0.14831	0.01091
Tr1 50-55	0.20607	0.01349
Fig. 4b	Methane oxidation rate
	ng g-1 DW hr-1
	estimate	err
Tr4 0-1	0.03889	0.00567
Tr4 1-16	0.02967	0.01314
T4 16-40	0.04538	0.01465
Tr4 40-50	0.03179	0.00901
Tr4 50-60	0.02628	0.00754
Fig. 4c	Methane oxidation rate ng g-1 DW hr-1
	Tr1		Tr2		Tr3		Tr4
	estimate	err	estimate	err	estimate	err	estimate	err
0-10cm	0.04243	0.01118	0.05322	0.00815	0.02391	0.00548	0.01453	0.00101
10-20cm	0.05776	0.006	0.09347	0.00366	0.13922	0.00647	0.01166	0.00586
20-30cm	0.10085	0.00699	0.14185	0.00302	0.06796	0.00608	0.03383	0.00666
30-40cm	0.42282	0.03333	0.13209	0.00557	0.04083	0.00494	0.02403	0.00539
40-50cm	0.1678	0.00954	0.19538	0.00584	0.02501	0.00821	0.02706	0.00468

## Sheet: Fig. 5 data
Fig. 5		Estimated methane oxidation rate
		nmol m-2 s-1	err
2023	Aug Tr1	1.26946	NA
	Aug Tr4	0.37389	NA
2024	Feb Tr1	1.47391	0.171022
	Feb Tr2	1.04474	0.220437
	Feb Tr3	0.235811	0.0971941
	Feb Tr4	0.157598	0.0208773

## Sheet: Fig. S1 data
Fig. S1-a	Methane concentration (ppmv)
Time (days)	-Litter_avg	-Litter_err	+Litter_avg	+Litter_err
0	46.8432	0.55107	46.765	0.28049
7	40.3316	2.96693	43.0851	1.43261
14	34.7002	6.57123	41.211	2.96984
21	28.8729	9.36698	38.6224	4.22406
29	23.6486	11.1064	35.8345	5.74302
Fig. S1-b	Methane concentration (ppmv)
Time (days)	Forest 1	Forest 2	Forest 3	Forest 4
0	47.254	46.1124	46.2512	46.7419
2	45.9481	39.1431	40.3538	45.0128
7	44.2852	16.1401	20.1818	40.0805
10	43.9459	6.29386	11.018	39.4489
14	43.5717	1.09857	1.54532	35.9183
21	43.285	0	0	33.0973
29	42.4402	0	0	31.0239
Fig. S1-c	Methane concentration (ppmv)
Time (days)	CRRC -F_avg	CRRC -F_err	CRRC +F_avg	CRRC +F_err
0	47.8212	0.82604	47.5334	0.74612
7	44.4064	0.73288	46.8919	1.18591
14	37.9757	1.20332	43.6645	1.31761
21	33.3705	2.0775	42.6721	2.21322
29	27.9181	2.95233	41.2713	3.69364

## Sheet: Fig. S2-S3 data
Figure S2 data
Sampling time			Block	Treatment	Water content	pH (1:1)	EC(1:5)	Total-N	OC	OM	C:N	PMOR
					%		µS cm-1	g kg-1	g kg-1	g kg-1		ng g-1 DW hr-1
Feb 2023	4	RubberBBD	B	Tr1	10.76	5.89	21.29	0.39403	4.26453	7.35206	10.823	0.06167
Feb 2023	5	RubberBBD	B	Tr1	10.45	5.51	19.71	0.31237	3.24605	5.59619	10.3917	0.06042
Feb 2023	6	RubberBBD	B	Tr1	10.8	5.8	18.26	0.32096	3.43223	5.91716	10.6938	0.04514
Feb 2023	16	RubberBBD	B	Tr2	10.64	5.24	19.98	0.4706	4.43407	7.64433	9.42218	0.01636
Feb 2023	17	RubberBBD	B	Tr2	9.07	5.56	18.39	0.31985	2.72587	4.69939	8.52233	0.014
Feb 2023	18	RubberBBD	B	Tr2	10.56	5.7	21.59	0.33261	3.56067	6.1386	10.7053	0.01431
Feb 2023	28	RubberBBD	B	Tr3	12.55	5.06	22.05	0.10207	7.64366	13.1777	74.8862	5.56952e-05
Feb 2023	29	RubberBBD	B	Tr3	9.27	5.37	22.23	0.18566	4.78513	8.24956	25.7733	0.00703
Feb 2023	30	RubberBBD	B	Tr3	9.23	5.2	16.25	0.08227	1.98513	3.42236	24.1288	0.01049
Feb 2023	40	RubberBBD	B	Tr4	12.68	5.39	17.31	0.25738	3.80366	6.55751	14.7786	0.01251
Feb 2023	41	RubberBBD	B	Tr4	9.28	4.84	16.21	0.21132	2.39765	4.13355	11.346	0.01171
Feb 2023	42	RubberBBD	B	Tr4	9.65	5.2	21.6	0.26116	3.11621	5.37234	11.9321	0.01169
Aug 2023	25	RubberBBD	A	Tr1	8.84	5.67	27.1	0.69819	4.56302	7.86665	6.53551	0.17316
Aug 2023	28	RubberBBD	B	Tr1	9.83	4.74	18.42	0.65202	4.00816	6.91006	6.14726	0.08356
Aug 2023	31	RubberBBD	C	Tr1	7.72	5.57	18.24	0.45301	2.33646	4.02805	5.15767	0.08831
Aug 2023	34	RubberBBD	D	Tr1	11.29	5.24	28.03	0.6234	5.32619	9.18234	8.54382	0.0595
Aug 2023	37	RubberBBD	A	Tr2	7.32	5.17	26.81	0.45198	3.65486	6.30097	8.0864	0.0185
Aug 2023	40	RubberBBD	B	Tr2	8.06	4.91	15.48	0.40138	2.43087	4.19083	6.05635	0.10417
Aug 2023	43	RubberBBD	C	Tr2	9.44	5.15	22.79	0.49039	3.33779	5.75436	6.80641	0.05024
Aug 2023	46	RubberBBD	D	Tr2	6.08	5.23	15.23	0.19125	1.62335	2.79866	8.48791	0.0669
Aug 2023	49	RubberBBD	A	Tr3	8.28	4.65	20.93	0.35461	2.72805	4.70315	7.69317	0.01562
Aug 2023	52	RubberBBD	B	Tr3	8.83	4.91	18.71	0.35308	2.98667	5.14901	8.45885	0.01884
Aug 2023	55	RubberBBD	C	Tr3	7.87	5.05	22.18	0.41752	3.56031	6.13798	8.52728	0.08178
Aug 2023	58	RubberBBD	D	Tr3	8.53	4.71	20.71	0.51475	3.72832	6.42763	7.24296	0.0311
Aug 2023	61	RubberBBD	A	Tr4	7.93	4.38	18.65	0.27004	2.32484	4.00802	8.60909	0.01575
Aug 2023	64	RubberBBD	B	Tr4	9.25	4.46	27.67	0.46912	3.36476	5.80085	7.17246	0.02038
Aug 2023	67	RubberBBD	C	Tr4	5.56	4.99	18.79	0.32612	2.56149	4.41602	7.85451	0.02223
Aug 2023	70	RubberBBD	D	Tr4	9.57	4.4	22.89	0.10112	4.32653	7.45894	42.7848	0.03823
Feb 2024	1		A	Tr1	6.35	5.36	59.92	0.22448	2.1934	0.7042	9.77106	0.13567
Feb 2024	6		A	Tr2	8.45	4.38	62.58	0.20917	1.89086	0.652	9.03989	0.04548
Feb 2024	11		A	Tr3	7.53	4.52	43.22	0.16858	1.34251	0.5575	7.96343	0.000563669
Feb 2024	16		A	Tr4	7.72	4.85	48.29	0.43162	1.51269	0.2608	3.50467	0.02727
Feb 2024	21		B	Tr1	8.58	5.07	69.16	0.56581	3.34682	0.577	5.91507	0.04243
Feb 2024	26		B	Tr2	6.64	5.21	33.84	0.30148	1.3236	0.2282	4.39032	0.05322
Feb 2024	31		B	Tr3	9.15	4.39	53.3	0.42278	2.6283	0.4532	6.21665	0.02391
Feb 2024	36		B	Tr4	7.11	4.61	51.54	0.31589	1.69232	0.2918	5.35728	0.01453
Feb 2024	41		C	Tr1	5.14	5.38	39.24	0.29318	1.34251	0.2315	4.57912	0.01157
Feb 2024	46		C	Tr2	8.85	4.63	42.38	0.27829	1.77741	0.3064	6.38688	0.01759
Feb 2024	51		C	Tr3	7.13	4.35	34.05	0.32536	2.48648	0.4287	7.64233	0.01821
Feb 2024	56		C	Tr4	6.08	4.56	30.82	0.18598	1.03052	0.1777	5.54109	0.02633
Feb 2024	61		D	Tr1	5.35	4.02	37.07	0.29675	1.40869	0.2429	4.74701	0.13369
Feb 2024	66		D	Tr2	6.4	4.67	54.64	0.41023	2.45812	0.4238	5.99203	0.01905
Feb 2024	71		D	Tr3	5.78	4.47	45.77	0.33998	1.72068	0.2967	5.06108	0.02528
Feb 2024	76		D	Tr4	7.76	4.22	30.62	0.3022	1.46542	0.2527	4.84909	0.02196

## Sheet: Fig. S4 data
Blk A Feb 2024
Time	Tr1 0-10cm	Tr1 10-20cm	Tr1 20-30cm	Tr1 30-40cm	Tr1 40-50cm	Tr2 0-10cm	Tr2 10-20cm	Tr2 20-30cm	Tr2 30-40cm	Tr2 40-50cm	Tr3 0-10cm	Tr3 10-20cm	Tr3 20-30cm	Tr3 30-40cm	Tr3 40-50cm	Tr4 0-10cm	Tr4 10-20cm	Tr4 20-30cm	Tr4 30-40cm	Tr4 40-50cm
0	48.4641	49.3751	51.3025	51.6621	46.0716	53.0094	51.2929	48.023	47.6634	46.388	49.1977	49.5093	51.6333	49.3511	51.1826	47.5771	46.6757	52.0457	48.3011	46.6469
8	48.3614	27.9939	45.9554	44.6395	44.8604	46.0514	41.8348	41.9693	44.4618	45.0381	49.7782	48.0829	49.8695	50.4457	48.203	47.9628	47.0071	49.4468	47.9532	47.8188
14	37.3098	8.75021	39.8178	37.6374	44.1688	46.2099	41.7964	40.9175	45.0765	43.1795	49.8118	47.5642	51.3294	50.974	50.3641	45.3983	46.3348	50.0183	47.6747	48.2846
21	33.7103	0	28.4655	22.2855	38.6754	43.4237	41.1821	37.1473	42.0305	41.9727	49.5555	47.9117	50.9197	50.4617	49.1891	43.6358	46.0123	48.0707	47.1934	47.444
28	26.705	0	15.6541	8.69352	33.288	44.6245	39.8372	34.5659	41.3862	39.5129	49.1697	46.6042	49.1503	48.9664	48.187	43.7822	46.0766	48.9083	46.7543	47.0786
Blk B Feb 2024
Time	Tr1 0-10cm	Tr1 10-20cm	Tr1 20-30cm	Tr1 30-40cm	Tr1 40-50cm	Tr2 0-10cm	Tr2 10-20cm	Tr2 20-30cm	Tr2 30-40cm	Tr2 40-50cm	Tr3 0-10cm	Tr3 10-20cm	Tr3 20-30cm	Tr3 30-40cm	Tr3 40-50cm	Tr4 0-10cm	Tr4 10-20cm	Tr4 20-30cm	Tr4 30-40cm	Tr4 40-50cm
0	48.7443	48.7394	49.5613	48.1339	49.321	49.3546	49.297	48.6193	50.3159	49.1047	49.2105	48.6001	49.2537	48.9461	48.0089	47.2943	47.9657	48.0906	48.0378	48.0906
7	47.5919	46.8199	45.5887	32.2409	44.7826	48.9061	45.9991	42.7745	44.338	42.1492	48.9745	44.5774	46.9714	46.776	47.7433	46.815	48.2124	46.1506	48.6081	48.3492
14	42.882	43.2547	39.6286	11.3225	36.7765	45.9587	41.9982	36.6523	37.6938	33.0549	46.9763	37.0249	44.1003	45.2851	46.2788	46.0021	46.102	45.1704	46.6418	45.9778
21	41.7886	40.2458	35.2739	0	28.7873	41.9627	36.9955	29.6622	31.8965	23.3544	45.2742	30.8288	39.4885	42.4848	43.3974	45.4642	45.9092	42.0709	44.9872	44.785
28	42.2918	39.4452	32.618	0	20.4627	41.3382	33.5716	24.3342	27.6221	15.1632	45.7553	25.1692	38.2116	42.2871	44.7922	43.8783	46.5666	42.7046	44.5787	43.9287
Blk C Feb 2024
Time	Tr1 0-10cm	Tr1 10-20cm	Tr1 20-30cm	Tr1 30-40cm	Tr1 40-50cm	Tr2 0-10cm	Tr2 10-20cm	Tr2 20-30cm	Tr2 30-40cm	Tr2 40-50cm	Tr3 0-10cm	Tr3 10-20cm	Tr3 20-30cm	Tr3 30-40cm	Tr3 40-50cm	Tr4 0-10cm	Tr4 10-20cm	Tr4 20-30cm	Tr4 30-40cm	Tr4 40-50cm
0	47.7527	48.6362	48.7042	47.6217	47.6022	48.9615	48.6459	47.4081	47.243	48.2042	48.3304	49.0149	49.1314	48.3158	47.976	49.5683	49.5877	49.4615	49.1362	48.6702
7	45.4379	45.9778	44.9602	37.4358	29.7919	45.8966	46.1546	40.4408	32.8304	43.8375	45.844	47.3441	47.4922	46.6418	46.7374	48.5958	46.3552	46.0924	46.9524	46.9476
14	43.9195	43.6137	42.9129	25.0901	13.1613	43.9007	45.0437	33.0207	16.2658	37.4564	45.547	45.5893	44.9778	44.324	44.8179	46.1161	46.2573	46.1632	45.5282	45.7869
21	45.0484	45.0958	39.3788	12.8859	2.6806	44.8539	45.1006	24.3484	3.25942	30.5114	44.8823	45.5181	44.479	44.1517	45.2903	45.4564	45.3141	45.1385	45.2856	45.7885
28	45.4885	45.4028	40.8887	4.62837	0	45.5933	44.6885	15.9612	0	23.6752	44.86	46.9646	44.7457	44.9504	44.5933	45.4885	45.4742	45.0504	45.8456	45.2885
Blk D Feb 2024
Time	Tr1 0-10cm	Tr1 10-20cm	Tr1 20-30cm	Tr1 30-40cm	Tr1 40-50cm	Tr2 0-10cm	Tr2 10-20cm	Tr2 20-30cm	Tr2 30-40cm	Tr2 40-50cm	Tr3 0-10cm	Tr3 10-20cm	Tr3 20-30cm	Tr3 30-40cm	Tr3 40-50cm	Tr4 0-10cm	Tr4 10-20cm	Tr4 20-30cm	Tr4 30-40cm	Tr4 40-50cm
0	47.0279	47.4369	47.123	46.9899	50.1717	47.9839	49.5629	47.5844	46.9613	48.1932	47.5606	47.2182	47.2134	50.7709	51.2561	49.2966	47.2705	47.9791	47.3418	48.507
7	39.8523	45.8053	39.9713	38.9426	42.9479	48.1818	48.0104	40.3285	29.8844	45.6148	45.5386	45.572	45.2624	50.663	47.0626	46.4626	45.029	45.2053	46.0625	46.6388
14	37.6626	47.3584	34.6615	29.0249	37.8742	48.1279	46.031	31.9538	6.89191	42.9193	46.4302	47.2622	46.2763	50.7106	48.4021	48.2	46.8438	49.893	49.2437	48.4309
21	28.3083	41.6465	24.1613	11.7538	27.645	45.1683	42.2811	20.4057	0	36.3876	43.4742	44.7102	42.3098	48.2702	45.9748	44.9631	44.3045	44.6433	44.8772	45.5978
28	24.3324	41.6051	16.2891	2.43324	18.8682	45.3891	41.4733	10.166	0	31.4909	43.1865	44.6925	44.3443	47.4646	45.1914	45.2479	43.21	44.2643	45.5162	45.3562

## Sheet: Fig. S5 data
		Head space methane concentration (ppmv)
Time (days)		Tr1									Tr4
		depth
		0-1 cm	1-10 cm	10-15 cm	15-25 cm	25-30 cm	30-40 cm	45-50 cm	50-55 cm		0-1 cm	1-16 cm	16-40 cm	40-50 cm	50-60 cm
0		50.6166	48.5659	47.9212	46.3553	46.2535	48.4108	47.4558	46.9322		50.2045	51.0044	52.9969	51.8576	50.762
7		41.0878	42.4749	38.4012	43.6819	32.877	42.178	42.5284	41.3214		46.7044	45.7018	47.3663	48.437	49.1963
14		40.5577	41.4368	26.1984	38.5406	18.0957	35.6443	35.5368	32.6845		46.2086	45.5981	45.31	46.9119	46.4284
21		38.4518	40.6756	15.5283	32.4453	7.92925	28.4394	30.8138	21.1074		43.8998	45.0554	45.5653	46.2353	46.7452
27		37.1493	40.2964	9.36243	27.6145	4.00403	23.8764	22.1182	13.9969		43.0889	44.9948	44.4974	46.3738	46.497

## Sheet: Fig. S6 data
Fig. S5 data
Block	Treatment	depth	Methane oxidation rate (ng g-1DW hr-1)
				error
A	Tr1-1	0-10cm	0.135665	0.0225052
A	Tr1-2	10-20cm	0.470196	0.0244374
A	Tr1-3	20-30cm	0.208337	0.0247708
A	Tr1-4	30-40cm	0.245093	0.02698
A	Tr1-5	40-50cm	0.0740235	0.0161102
A	Tr2-1	0-10cm	0.0454815	0.0170695
A	Tr2-2	10-20cm	0.0558189	0.0218657
A	Tr2-3	20-30cm	0.0737913	0.00755783
A	Tr2-4	30-40cm	0.035128	0.00669243
A	Tr2-5	40-50cm	0.0388102	0.00290605
A	Tr3-1	0-10cm	0.000563669	0.00259031
A	Tr3-2	10-20cm	0.0140939	0.00370952
A	Tr3-3	20-30cm	0.00941321	0.00690429
A	Tr3-4	30-40cm	0.00165503	0.00716151
A	Tr3-5	40-50cm	0.0121206	0.00873497
A	Tr4-1	0-10cm	0.0272665	0.00717278
A	Tr4-2	10-20cm	0.00493753	0.00208374
A	Tr4-3	20-30cm	0.0180132	0.007159
A	Tr4-4	30-40cm	0.00893689	0.000533522
A	Tr4-5	40-50cm	-0.00125893	-0.0052783
B	Tr4-1	0-10cm	0.0145253	0.00101471
B	Tr4-2	10-20cm	0.0116649	0.00586289
B	Tr4-3	20-30cm	0.0338262	0.00665778
B	Tr4-4	30-40cm	0.0240272	0.00538921
B	Tr4-5	40-50cm	0.0270589	0.00467951
C	Tr1-1	0-10cm	0.0115742	0.00994497
C	Tr1-2	10-20cm	0.0168827	0.0119327
C	Tr1-3	20-30cm	0.0484671	0.0120052
C	Tr1-4	30-40cm	0.254786	0.00931795
C	Tr1-5	40-50cm	0.346563	0.0277229
C	Tr2-1	0-10cm	0.0175917	0.0120307
C	Tr2-2	10-20cm	0.0203587	0.00641762
C	Tr2-3	20-30cm	0.179704	0.00478734
C	Tr2-4	30-40cm	0.336283	0.0104373
C	Tr2-5	40-50cm	0.141107	0.00668803
C	Tr3-1	0-10cm	0.0182068	0.00580765
C	Tr3-2	10-20cm	0.0136895	0.00922712
C	Tr3-3	20-30cm	0.0270898	0.00719604
C	Tr3-4	30-40cm	0.0211433	0.00845217
C	Tr3-5	40-50cm	0.0186897	0.00511529
C	Tr4-1	0-10cm	0.0263251	0.00572951
C	Tr4-2	10-20cm	0.0210827	0.00769741
C	Tr4-3	20-30cm	0.0221464	0.00760042
C	Tr4-4	30-40cm	0.0186183	0.00735695
C	Tr4-5	40-50cm	0.0178858	0.00435373
D	Tr1-1	0-10cm	0.133685	0.0126936
D	Tr1-2	10-20cm	0.0365688	0.0130896
D	Tr1-3	20-30cm	0.178541	0.0106044
D	Tr1-4	30-40cm	0.266467	0.0199819
D	Tr1-5	40-50cm	0.177371	0.0115268
D	Tr2-1	0-10cm	0.0190479	0.00716145
D	Tr2-2	10-20cm	0.050883	0.00547068
D	Tr2-3	20-30cm	0.219434	0.0113193
D	Tr2-4	30-40cm	0.460614	0.0392618
D	Tr2-5	40-50cm	0.0970131	0.0107077
D	Tr3-1	0-10cm	0.0252762	0.00679399
D	Tr3-2	10-20cm	0.0136425	0.00739054
D	Tr3-3	20-30cm	0.0199063	0.0108061
D	Tr3-4	30-40cm	0.0206084	0.00583412
D	Tr3-5	40-50cm	0.0302683	0.00959729
D	Tr4-1	0-10cm	0.0219604	0.00922305
D	Tr4-2	10-20cm	0.020229	0.00821262
D	Tr4-3	20-30cm	0.0182126	0.0173464
D	Tr4-4	30-40cm	0.0109806	0.012864
D	Tr4-5	40-50cm	0.0166664	0.00795187
