# Supplementary material for: Methane oxidation potential of soils in a rubber plantation in Thailand affected by fertilization
Source: Copernicus journal article supplement (doi:10.5194/soil-11-457-2025), 2025-06-16
Supplement: Supplementary file 1 [file soil-11-457-2025-supplement.zip]

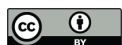

*Supplement of*

## **Methane oxidation potential of soils in a rubber plantation in Thailand affected by fertilization**

**Jun Murase et al.**

*Correspondence to:* Jun Murase ([murase@agr.nagoya-u.ac.jp](mailto:murase@agr.nagoya-u.ac.jp)) and Kannika Sajjaphan ([agrkks@ku.ac.th](mailto:agrkks@ku.ac.th))

- [soil-11-457-2025-supplement-title-page.pdf](#)
- [Data for figures\\_Murase\\_et\\_alSOIL.xlsx](#)
- [Murase-et-al\\_Supplementary figures\\_250402.pdf](#)

The copyright of individual parts of the supplement might differ from the article licence.
